# Supplementary material for: Influence of Lower Tropospheric Moisture on Local Soil Moisture-Precipitation Feedback over the U.S. Southern Great Plains
Source: Copernicus journal article supplement (doi:10.5194/egusphere-2023-1897), 2023-09-07
Supplement: Supplementary file 1 [file egusphere-2023-1897-supplement.pdf]

## Supplements

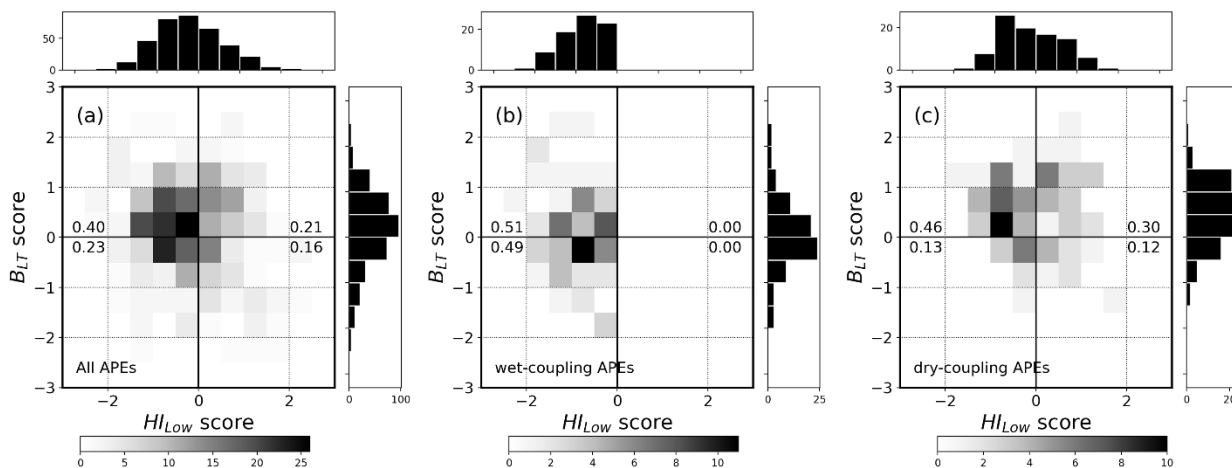

Figure S1: Joint distribution of (a) all APEs, (b) wet-coupling APEs and (c) dry-coupling APEs as functions of  $B_{LT}$  score and  $HI_{Low}$  score. The number indicates the fraction in each quadrant.

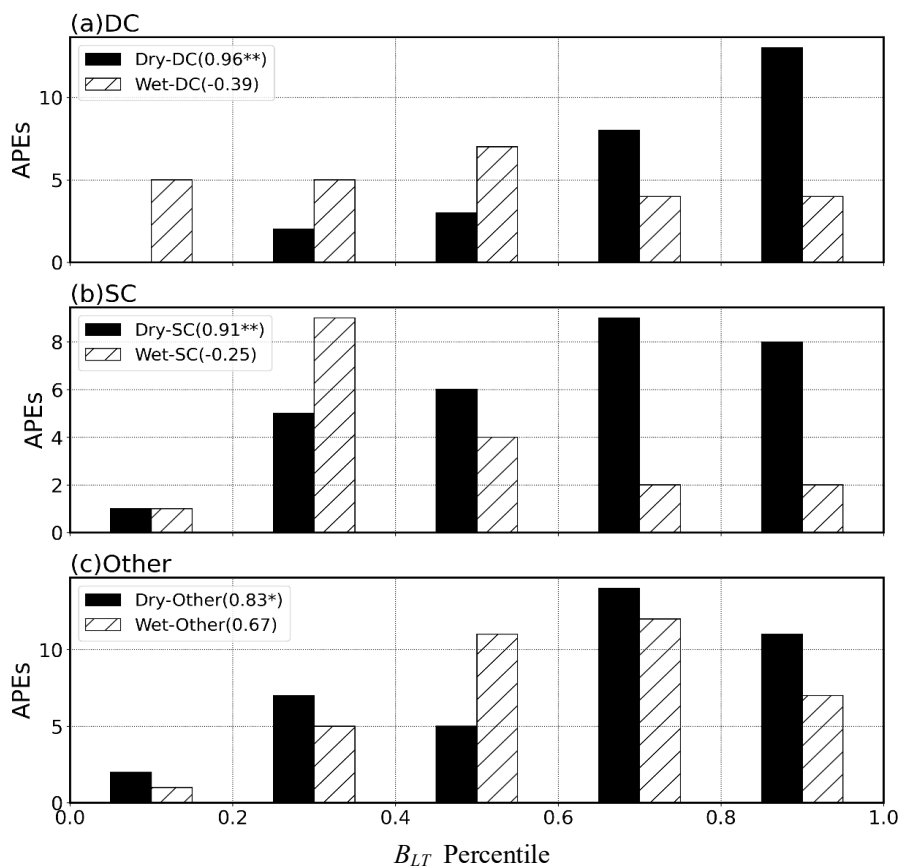

Figure S2: Distribution of deep convection (DC), shallow convection (SC), and congestus APEs over wet- and dry-coupling conditions as a function of  $B_{LT}$  percentile with every 0.2 bins. Their correlation coefficients with  $B_{LT}$  percentiles are shown in the legend, correlation coefficients significant ( $p < 0.1$ ) are marked with an asterisk while two asterisks indicate correlation coefficients are significant at 95% level.
